# Supplementary material for: Purine Auxotrophic Starvation Evokes Phenotype Similar to Stationary Phase Cells in Budding Yeast
Source: MDPI journal article supplement (doi:10.3390/jof8010029), 2021-12-29
Supplement: s1 [file s1]

|       | CO <sub>2</sub> | ethanol | acetate | glycerol | biomass | glucose uptake | Specific growth rate $\mu$ [h <sup>-1</sup> ] |
|-------|-----------------|---------|---------|----------|---------|----------------|-----------------------------------------------|
| SD+ 1 | 32,5926         | 42,5513 | 1,21479 | 1,51756  | 17,0405 | 86,5755        | 0,39875                                       |
| SD+ 2 | 24,8146         | 34,5129 | 1,86647 | 1,22979  | 19,2025 | 75,6468        | 0,44934                                       |
| SD+ 3 | 31,2419         | 31,4441 | 1,64147 | 0,92436  | 16,7734 | 81,3465        | 0,3925                                        |
|       |                 |         |         |          |         |                |                                               |
| Ade-1 | 9,15992         | 16,2818 | 0,63756 | 2,86901  | 6,58208 | 43,0184        | 0,15402                                       |
| Ade-2 | 9,76494         | 16,0706 | 1,25228 | 3,71468  | 4,89126 | 40,5307        | 0,11446                                       |
| Ade-3 | 4,11028         | 21,9096 | 0,98627 | 4,14574  | 7,55704 | 47,6182        | 0,17683                                       |

Specific production (or consumption in glucose case)  $q$  values in  $\text{mCmols} \cdot \text{gDW}^{-1} \cdot \text{h}^{-1}$  from *ade8* cultivations in SD+ and ade- medias. Cultivations were performed in triplicates in 0.4 L reactors (starting volume 0.3 L). Samples from SD were taken after 4 hours of cultivation when max specific growth rate was reached. Samples from starving cells were harvested after 5.5 h of cultivation.
