# Supplementary material for: Purine Auxotrophic Starvation Evokes Phenotype Similar to Stationary Phase Cells in Budding Yeast
Source: J Fungi (Basel). 2021 Dec 29;8(1):29. doi: 10.3390/jof8010029 (PMC8780165; doi:10.3390/jof8010029)
Supplement: Supplementary file 1 [file jof-08-00029-s001.zip]

Archive with 4 entries (4 files):
- Supplementary File S1.pdf
- Supplementary File S2.xlsx
- Supplementary File S3.xlsx
- Supplementary File S4.pdf
